# Supplementary material for: Alkaloids of the Genus Datura: Review of a Rich Resource for Natural Product Discovery
Source: MDPI journal article supplement (doi:10.3390/molecules26092629), 2021-04-30
Supplement: s1 [file s1]

Review

# Alkaloids of the genus *Datura*: review of a rich resource for natural product discovery

Maris A. Cinelli <sup>1\*</sup> and A. Daniel Jones <sup>1,\*</sup>

## Electronic Supplementary Material

### Contents:

|           |                                                              |
|-----------|--------------------------------------------------------------|
| Table S1: | Monosubstituted Tropane Alkaloids Described in <i>Datura</i> |
| Table S2: | Disubstituted Tropane Alkaloids from <i>Datura</i>           |
| Table S3: | 3,6,7-Trisubstituted Tropane Alkaloids from <i>Datura</i>    |
| Table S4: | 3-Substituted 6,7-Epoxytropane Alkaloids from <i>Datura</i>  |
| Table S5: | Nortropanes Detected in <i>Datura</i>                        |

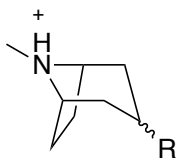

**Table S1: Monosubstituted Tropane Alkaloids Described in *Datura*.**

| R = | Stereochemistry at position 3 (and common name and number) | Species found in                                                                                                                                                                                                                                                                                            | References (see main text for reference numbers)                             |
|-----|------------------------------------------------------------|-------------------------------------------------------------------------------------------------------------------------------------------------------------------------------------------------------------------------------------------------------------------------------------------------------------|------------------------------------------------------------------------------|
| OH  | $\alpha$ (tropine, $\alpha$ -10) <sup>b</sup>              | All (some variation in varieties), including some transformed root cultures                                                                                                                                                                                                                                 | 22, 39, 40, 61, 64, 67, 68, 72, 73, 75, 76, 114-115, 118, 128, 130, 146, 152 |
| OH  | $\beta$ (Pseudotropine, $\beta$ -10)                       | <i>D. inoxia</i> (including root cultures), <i>D. discolor</i> , <i>D. ferox</i> , <i>D. wrightii</i> , <i>D. leichhardtii</i> , <i>D. stramonium</i> (including hairy root cultures), <i>D. ceratocaula</i> , <i>D. quercifolia</i> (root cultures)                                                        | 22, 39, 40, 61, 64, 67, 68, 73, 113-114, 118, 130, 152                       |
| OAc | $\alpha$ ( $\alpha$ -24)                                   | <i>D. inoxia</i> (including root cultures), <i>D. leichhardtii</i> ssp. <i>pruinosa</i> (isomer unspecified), <i>D. stramonium</i> (isomer unspecified, including hairy root cultures), <i>D. quercifolia</i> (root cultures), <i>D. ceratocaula</i> (isomer unspecified). <i>D. wrightii</i> root cultures | 39, 40, 61, 64, 67, 68, 72, 73, 113-114, 118, 128, 146, 152                  |
| OAc | $\beta$ ( $\beta$ -24)                                     | <i>D. inoxia</i> , <i>D. stramonium</i> (root cultures), <i>D. wrightii</i> root cultures                                                                                                                                                                                                                   | 39, 102, 128                                                                 |
| =O  | N/A (tropinone, 19)                                        | <i>D. leichhardtii</i> and ssp <i>pruinosa</i> , <i>D. metel</i> (var. <i>fastuosa</i> ), <i>D. inoxia</i> (including root cultures), <i>D. stramonium</i> (including root cultures), <i>D. quercifolia</i> (root cultures)                                                                                 | 22, 40, 61, 67, 68, 72, 75, 83, 89, 114, 118, 146                            |

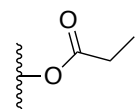

$\alpha$  ( $\alpha$ -25)

*D. inoxia*

39

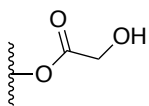

Unspecified, 26

*D. inoxia*, *D. stramonium*, *D. ferox*, *D. leichhardtii* (both ssp), *D. wrightii*,  
*D. metel* (including var. *fastuosa*), *D. ceratocaula*,

40, 63, 64, 113, 118, 146

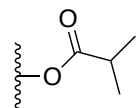

$\alpha$  ( $\alpha$ -27)

*D. inoxia*

39

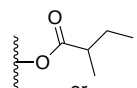

or

$\alpha$  ( $\alpha$ -28)<sup>a</sup>

*D. stramonium* (isomer unspecified), *D. inoxia*

39, 64

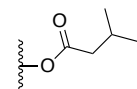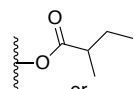

or

$\beta$  ( $\beta$ -29)<sup>a</sup>

*D. inoxia*

39

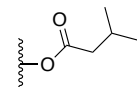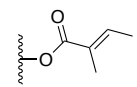

$\alpha$  ( $\alpha$ -23)

*D. stramonium* (cultures, and plant, isomer unspecified), *D. inoxia* (plant  
and root cultures), *D. ceratocaula*, *D. stramonium* (var. *tatula*, var.  
*godronii*), *D. wrightii*, *D. leichhardtii* (both ssp), *D. metel* (including var.  
*fastuosa*), *D. ferox*

22, 37, 39, 40, 61, 64, 68, 72, 73, 75, 83, 91, 113-  
115, 118, 128, 151-152

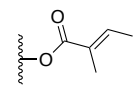

$\beta$  (tigloidine),  $\beta$ -23

*D. inoxia* (including root cultures), *D. ceratocaula*, *D. ferox*, *D.*  
*leichhardtii* ssp. *pruinosa*, *D. metel* (including *D. fastuosa*), *D.*  
*stramonium*

22, 39, 40, 61, 64, 68, 72, 73, 83, 114

|  |                                                                                       |                                                                                                                                                                                                                                                                                                                                       |                                                                             |
|--|---------------------------------------------------------------------------------------|---------------------------------------------------------------------------------------------------------------------------------------------------------------------------------------------------------------------------------------------------------------------------------------------------------------------------------------|-----------------------------------------------------------------------------|
|  | $\alpha$ (or unspecified, $\alpha$ - <b>30</b> )                                      | <i>D. inoxia</i> , (isomer unspecified, including hairy root cultures) <i>D. stramonium</i> (multiple varieties and hairy root cultures), <i>D. ferox</i> , <i>D. wrightii</i> , <i>D. leichhardtii</i> (both ssp), <i>D. metel</i> (including var. <i>fastuosa</i> ), <i>D. ceratocaula</i> , <i>D. quercifolia</i> (root cultures), | 22, 40, 61, 64, 67, 73, 68, 72, 83, 75, 91, 113-115, 140                    |
|  | $\beta$ ( $\beta$ - <b>30</b> )                                                       | <i>D. stramonium</i>                                                                                                                                                                                                                                                                                                                  | 68, 140                                                                     |
|  | Stereochemistry unspecified, described as just "homatropine" ( <b>31</b> )            | <i>D. metel</i>                                                                                                                                                                                                                                                                                                                       | 41                                                                          |
|  | $\alpha$ (littorine), <b>11</b>                                                       | All except <i>D. quercifolia</i> , including hairy root cultures                                                                                                                                                                                                                                                                      | 32, 40, 64, 68, 72, 73, 89, 109, 118, 130, 146, 152                         |
|  | $\alpha$ (presumably), <b>32</b>                                                      | <i>D. inoxia</i> , <i>D. stramonium</i>                                                                                                                                                                                                                                                                                               | 64, 113                                                                     |
|  | Unspecified, <b>33</b>                                                                | <i>D. inoxia</i>                                                                                                                                                                                                                                                                                                                      | 146                                                                         |
|  | Unspecified, <b>34</b>                                                                | <i>D. inoxia</i> , <i>D. stramonium</i>                                                                                                                                                                                                                                                                                               | 64, 68, 72                                                                  |
|  | $\alpha$ (hyoscyamine, or reported as "atropine"), ( <i>S</i> )- <b>1</b> or <b>1</b> | All species, including transformed root cultures                                                                                                                                                                                                                                                                                      | 22, 40, 36, 39, 61, 64, 68, 72, 73-75, 91, 115, 128, 130, 140, 146, 151-152 |
|  | Not specified, but presumably $\alpha$ , <b>35</b>                                    | <i>D. stramonium</i> , <i>D. wrightii</i> , <i>D. ceratocaula</i> , <i>D. inoxia</i>                                                                                                                                                                                                                                                  | 40, 68, 73, 91, 146, 151.                                                   |

|                                                                                    |                                                                 |                                                                                                                                                                                                                  |                                                                           |
|------------------------------------------------------------------------------------|-----------------------------------------------------------------|------------------------------------------------------------------------------------------------------------------------------------------------------------------------------------------------------------------|---------------------------------------------------------------------------|
| 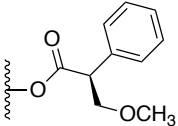  | Not specified, but presumably $\alpha$ , <b>36</b>              | <i>D. inoxia</i> (including hairy root cultures), <i>D. stramonium</i>                                                                                                                                           | 61, 64, 68, 75, 113                                                       |
|   | Not specified, but presumably $\alpha$ , <b>37</b>              | <i>D. stramonium</i> (multiple varieties), <i>D. ferox</i> , <i>D. inoxia</i> , <i>D. wrightii</i> , <i>D. leichhardtii</i> (both ssp), <i>D. metel</i> (including var. <i>fastuosa</i> ), <i>D. ceratocaula</i> | 22, 32, 40, 64, 68, 72, 73, 114, 151                                      |
|   | $\alpha$ ( $\alpha$ - <b>38</b> )                               | <i>D. quercifolia</i>                                                                                                                                                                                            | 73                                                                        |
|   | Not specified, but presumably $\alpha$ ( $\alpha$ - <b>39</b> ) | All except <i>D. discolor</i> , including multiple transformed root cultures                                                                                                                                     | 22, 39, 40, 41, 61, 64, 67, 68, 72, 73, 75, 83, 91, 114-115, 118, 151-152 |
|   | $\beta$ (proposed), $\beta$ - <b>39</b>                         | <i>D. stramonium</i>                                                                                                                                                                                             | 151                                                                       |
|  | $\alpha$ (datumetine), <b>8</b>                                 | <i>D. metel</i>                                                                                                                                                                                                  | 45                                                                        |

<sup>a</sup>Some references (e.g., 39) refer to separate isomers as “2-methylbutyryloxy”- and “methylbutyryloxy”. These are presumably valeroyl and isovaleroyl and are classified as such. <sup>b</sup>7-hydroxytropine is reported in reference 140 – there do not appear to be any other references to this compound.

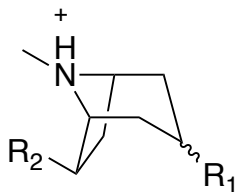

**Table S2: Disubstituted Tropane Alkaloids from *Datura*.**

| R <sub>1</sub> = | R <sub>2</sub> = | Stereochemistry<br>at Position 3 and<br>number                            | Species found in                                                                                                                                                                           | References (see main text for reference<br>numbers) |
|------------------|------------------|---------------------------------------------------------------------------|--------------------------------------------------------------------------------------------------------------------------------------------------------------------------------------------|-----------------------------------------------------|
| OH               | OH               | Not specified, <b>41</b>                                                  | <i>D. inoxia</i> , <i>D. metel</i> var. <i>fastuosa</i> , <i>D. ceratocaula</i> , <i>D. stramonium</i>                                                                                     | 22, 40, 64, 83, 113                                 |
| OAc              | OH               | Not specified, <b>44<sup>b</sup></b>                                      | <i>D. inoxia</i> (including root cultures), <i>D. stramonium</i> (multiple varieties,<br>including root cultures), <i>D. ceratocaula</i> , <i>D. wrightii</i> (root cultures)              | 61, 64, 68, 72, 73, 91, 113-115, 118, 128,<br>151   |
| OH               | OAc              | Not specified,<br>specified as $\alpha$ in<br><i>D. metel</i> , <b>45</b> | <i>D. stramonium</i> , <i>D. metel</i> var. <i>fastuosa</i> , <i>D. quercifolia</i> (root cultures)                                                                                        | 40, 64, 68, 72, 128                                 |
| OAc              | OAc              | Not specified, <b>42</b>                                                  | <i>D. ceratocaula</i> , <i>D. stramonium</i> (including root cultures), <i>D. metel</i><br>(including var. <i>fastuosa</i> ), <i>D. quercifolia</i> , <i>D. ferox</i> , <i>D. inoxia</i> , | 40, 64, 68, 72, 73, 113, 118, 128,                  |

|                                                                                                                                                                                  |                                                                                                                                                                               |                                       |                                                                                                                                                            |                            |
|----------------------------------------------------------------------------------------------------------------------------------------------------------------------------------|-------------------------------------------------------------------------------------------------------------------------------------------------------------------------------|---------------------------------------|------------------------------------------------------------------------------------------------------------------------------------------------------------|----------------------------|
| OH                                                                                                                                                                               | 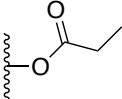                                                                                             | Not specified, <b>46</b>              | <i>D. metel</i> , including var. <i>fastuosa</i>                                                                                                           | 40                         |
| OH                                                                                                                                                                               |                                                                                              | Not specified, <b>47</b>              | <i>D. stramonium</i> , <i>D. inoxia</i>                                                                                                                    | 64, 113                    |
| OAc                                                                                                                                                                              |                                                                                              | Not specified, <b>48</b>              | <i>D. stramonium</i>                                                                                                                                       | 68, 72                     |
|                                                                                                 | OH                                                                                                                                                                            | Not specified, <b>49</b> <sup>a</sup> | <i>D. inoxia</i> , <i>D. wrightii</i>                                                                                                                      | 40, 114                    |
| OH                                                                                                                                                                               | <br>or<br> | Not specified, <b>50</b> <sup>a</sup> | <i>D. inoxia</i> (including hairy root cultures), <i>D. metel</i> var. <i>fastuosa</i> , <i>D. wrightii</i> , <i>D. ceratocaula</i> , <i>D. stramonium</i> | 40, 49, 61, 64, 68, 72, 73 |
| <br>or<br> | OH                                                                                                                                                                            | Not specified, <b>51</b>              | <i>D. inoxia</i> , <i>D. metel</i> var. <i>fastuosa</i> , <i>D. ferox</i> , <i>D. stramonium</i> (multiple varieties)                                      | 40, 64, 68, 113-114        |
| OH                                                                                                                                                                               |                                                                                            | $\alpha$ , $\alpha$ - <b>9</b>        | <i>D. ceratocaula</i>                                                                                                                                      | 49                         |

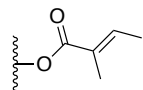

OH

Not specified, or  $\alpha$ ,  $\alpha$ -52

*D. stramonium* (multiple varieties), *D. ferox*, *D. inoxia* (including hairy root cultures), *D. wrightii*, *D. ceratocaula*, *D. stramonium* hairy root cultures, *D. leichhardtii* (both ssp.), *D. metel* (including var. *fastuosa*)

22, 40, 49, 61, 64, 68, 72, 73, 75, 91, 113-114, 118, 128, 140, 146, 151

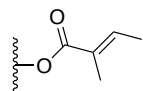

OH

$\beta$ ,  $\beta$ -52

*D. ceratocaula*, *D. stramonium*

68, 72, 73

OH

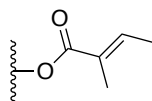

Not specified or  $\alpha$  ( $\alpha$ -53)

*D. inoxia* (including hairy root cultures), *D. stramonium* (multiple varieties), *D. ceratocaula*, *D. ferox*, *D. wrightii*, *D. leichhardtii* (both ssp.), *D. metel* (including var. *fastuosa*)

22, 49, 61, 64, 68, 72, 73, 75, 91, 113-115, 128, 140, 151

OH

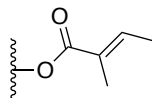

$\beta$  ( $\beta$ -53)

*D. stramonium* (multiple varieties), *D. inoxia*

22, 64, 113

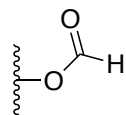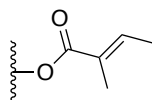

Not specified or  $\alpha$  ( $\alpha$ -54)

*D. stramonium*

68

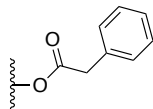

OH

Not specified, but presumably  $\alpha$  ( $\alpha$ -55)

*D. stramonium*, *D. inoxia*

40, 64, 68, 72, 113

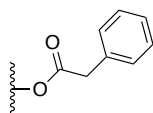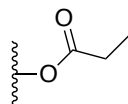

$\alpha$  ( $\alpha$ -56)

*D. stramonium*

68



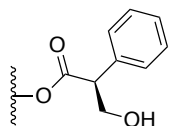

OH

Not specified, but presumably  $\alpha$ , **40**

*D. stramonium* (multiple varieties), *D. inoxia* (including transformed root cultures), *D. wrightii*, *D. leichhardtii* (both ssp.), *D. metel* (including var. *fastuosa*), *D. ceratocaula*, *D. ferox*

36, 40, 61, 64, 68, 72, 73, 75, 91, 113-115, 128, 146, 151

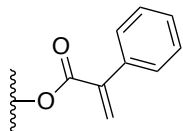

OH

Not specified, or  $\alpha$ , **57**

*D. stramonium*, *D. ceratocaula*, *D. inoxia* (including hairy roots), *D. wrightii*, *D. leichhardtii* (both ssp), *D. metel*

40, 61, 64, 68, 72, 73, 75, 83, 113

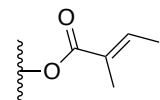

OAc

$\alpha$ ,  $\alpha$ -**58**

*D. inoxia*, *D. metel* var. *fastuosa*, *D. leichhardtii* (both ssp.), *D. ceratocaula*, *D. stramonium* (including root cultures), *D. discolor* (possibly)

40, 49, 64, 68, 72, 114, 118,

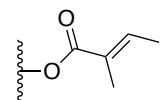

OAc

$\beta$ ,  $\beta$ -**58**

*D. ceratocaula*

40

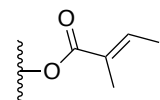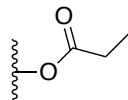

Not specified, or  $\alpha$ , **59**

*D. inoxia*, *D. metel* (including var. *fastuosa*), *D. stramonium* (multiple varieties), *D. ferox*, *D. wrightii*, *D. leichhardtii* (both ssp.)

22, 40, 49, 64, 68, 72, 114

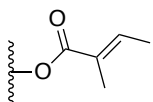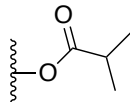

Not specified, or  
 $\alpha$ , **60**

*D. stramonium* (multiple varieties and hairy root cultures), *D. inoxia*,  
*D. ferox*, *D. wrightii*, *D. leichhardtii* ssp. *pruinosa*, *D. metel* (including  
var. *fastuosa*)

22, 64, 68, 72, 113-115, 118, 151

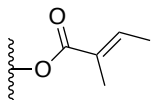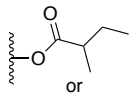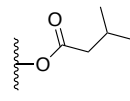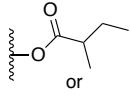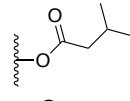

$\alpha$ ,  $\alpha$ -**61**<sup>a</sup>

*D. stramonium* (multiple varieties and hairy root cultures), *D. ferox*, *D.*  
*inoxia*, *D. wrightii*, *D. leichhardtii* (both ssp.), *D. metel* (including var.  
*fastuosa*)

22, 32, 40, 49, 64, 68, 72, 114, 140, 151

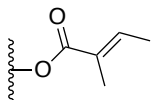

$\beta$ ,  $\beta$ -**61**<sup>a</sup>

*D. stramonium*

68

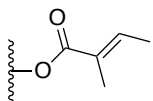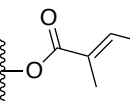

Not specified, or  
 $\alpha$ ,  $\alpha$ -**43**

*D. stramonium* (multiple varieties and hairy root cultures), *D. ferox*, *D.*  
*inoxia* (including hairy root cultures), *D. wrightii*, *D. leichhardtii* (both  
ssp.), *D. metel* (including var. *fastuosa*), *D. ceratocaula*, *D. discolor*

22, 40, 49, 61, 64, 68, 72, 113, 128, 140, 146,  
151-152

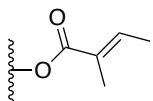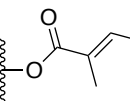

$\beta$ ,  $\beta$ -**43**

*D. inoxia* (including hairy root cultures) *D. wrightii*, *D. stramonium*  
(multiple varieties)

40, 61, 68, 72, 114

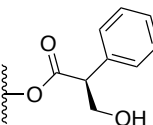

OAc

Not specified, but  
presumably  $\alpha$ , **62**

*D. stramonium*

64, 68, 72, 83

|                                                                                   |                                                                                                                                                                              |                                                               |                                                                                                               |                                          |
|-----------------------------------------------------------------------------------|------------------------------------------------------------------------------------------------------------------------------------------------------------------------------|---------------------------------------------------------------|---------------------------------------------------------------------------------------------------------------|------------------------------------------|
| 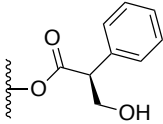 |                                                                                             | Not specified, but presumably $\alpha$ , <b>63</b>            | <i>D. inoxia</i> (including hairy roots), <i>D. ceratocaula</i> , <i>D. stramonium</i>                        | 40, 49, 61, 64, 68, 73, 91, 113-114, 151 |
|  |                                                                                             | Not specified, but presumably $\alpha$ , <b>64</b>            | <i>D. stramonium</i>                                                                                          | 64                                       |
|  | <br>or<br> | Not specified, but presumably $\alpha$ , $\alpha$ - <b>65</b> | <i>D. inoxia</i> (including hairy root cultures), <i>D. metel</i> var. <i>fastuosa</i> , <i>D. stramonium</i> | 40, 49, 61, 64, 114                      |
|  | <br>or<br> | $\beta$ , $\beta$ - <b>65</b>                                 | <i>D. stramonium</i>                                                                                          | 64                                       |

<sup>a</sup>Some references (e.g., 49) refer to separate isomers as “2-methylbutyryloxy”- and “methylbutyryloxy”. These are presumably valeroyl and isovaleroyl and are classified as such.

<sup>b</sup>Sometimes referred to as “6-hydroxyacetoxytropane (e.g., reference 72).

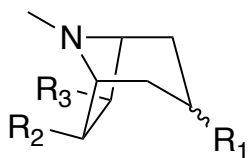

**Table S3: 3,6,7-Trisubstituted Tropane Alkaloids from *Datura*.**

| R <sub>1</sub> = | R <sub>2</sub> = | R <sub>3</sub> = | Stereochemistry at Position 3                             | Species found in                                                                                                                                                                                                            | References (see main text for reference numbers) |
|------------------|------------------|------------------|-----------------------------------------------------------|-----------------------------------------------------------------------------------------------------------------------------------------------------------------------------------------------------------------------------|--------------------------------------------------|
| OH               |                  | OH               | Not specified, <b>67</b>                                  | <i>D. stramonium</i>                                                                                                                                                                                                        | 64                                               |
| OAc              |                  | OH               | Not specified, <b>68</b>                                  | <i>D. inoxia</i>                                                                                                                                                                                                            | 113                                              |
|                  |                  | OH               | Not specified, presumably $\alpha$ , $\alpha$ - <b>69</b> | <i>D. stramonium</i> (including hairy root cultures), <i>D. ferox</i> , <i>D. inoxia</i> , <i>D. wrightii</i> , <i>D. leichhardtii</i> (both ssp), <i>D. metel</i> (including var. <i>fastuosa</i> ), <i>D. ceratocaula</i> | 22, 40, 64, 68, 72, 73, 113, 118                 |

|                                                                                     |                                                                                     |    |                                               |                                                                                                                                                                                                                                                                                                                                  |                                                                           |
|-------------------------------------------------------------------------------------|-------------------------------------------------------------------------------------|----|-----------------------------------------------|----------------------------------------------------------------------------------------------------------------------------------------------------------------------------------------------------------------------------------------------------------------------------------------------------------------------------------|---------------------------------------------------------------------------|
| 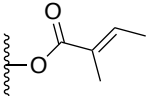   |    | OH | Not specified, possibly $\beta$ , $\beta$ -69 | <i>D. inoxia</i> , <i>D. stramonium</i>                                                                                                                                                                                                                                                                                          | 68, 114                                                                   |
|    |    | OH | Not specified, 70                             | <i>D. stramonium</i>                                                                                                                                                                                                                                                                                                             | 64                                                                        |
|    |    | OH | $\alpha$ or unspecified, $\alpha$ -71         | <i>D. stramonium</i> (multiple varieties), <i>D. ferox</i> , <i>D. inoxia</i> , <i>D. wrightii</i> , <i>D. leichhardtii</i> (both ssp), <i>D. metel</i> var. <i>fastuosa</i> , <i>D. ceratocaula</i>                                                                                                                             | 22, 37, 40, 64, 68, 91, 113, 140                                          |
|    |    | OH | $\beta$ , $\beta$ -71                         | <i>D. stramonium</i> (multiple varieties and hairy root cultures)                                                                                                                                                                                                                                                                | 22, 64, 68, 72, 91, 140, 151                                              |
|  |  | OH | $\alpha$ or unspecified ( $\alpha$ -72)       | <i>D. stramonium</i> (multiple varieties and hairy root cultures), <i>D. ceratocaula</i> , <i>D. ferox</i> , <i>D. inoxia</i> (including hairy root cultures), <i>D. wrightii</i> , <i>D. leichhardtii</i> (both ssp), <i>D. metel</i> (including <i>D. fastuosa</i> ), <i>D. discolor</i> , <i>D. quercifolia</i> (hairy roots) | 22, 32, 39, 40, 61, 64, 68, 72, 73, 91, 114, 118, 128, 130, 140, 146, 152 |

|                                                                                   |                                                                                     |                                                                                     |                                     |                                                                                                                                                                                                                                   |                                                    |
|-----------------------------------------------------------------------------------|-------------------------------------------------------------------------------------|-------------------------------------------------------------------------------------|-------------------------------------|-----------------------------------------------------------------------------------------------------------------------------------------------------------------------------------------------------------------------------------|----------------------------------------------------|
| 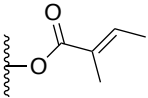 |    | OH                                                                                  | $\beta$ , $\beta$ - <b>72</b>       | <i>D. inoxia</i> , <i>D. stramonium</i>                                                                                                                                                                                           | 40, 68, 72, 91, 151                                |
|  |    | OH                                                                                  | $\alpha$ - <b>73</b>                | <i>D. stramonium</i>                                                                                                                                                                                                              | 39                                                 |
|  | OH                                                                                  | OH                                                                                  | (meteloidine), $\alpha$ - <b>20</b> | <i>D. wrightii</i> , <i>D. leichhardtii</i> (ssp. <i>pruinosa</i> ), <i>D. metel</i> (including <i>D. fastuosa</i> , <i>D. ceratocaula</i> , <i>D. inoxia</i> , <i>D. stramonium</i> (including root cultures), <i>D. ferox</i> ) | 32, 39, 40, 64, 72, 73, 91, 114, 140, 146, 151-152 |
|  | OH                                                                                  | OH                                                                                  | $\beta$ , $\beta$ - <b>20</b>       | <i>D. ceratocaula</i>                                                                                                                                                                                                             | 73                                                 |
| OH                                                                                |  | OH                                                                                  | Unspecified, <b>74</b>              | <i>D. inoxia</i> , <i>D. stramonium</i>                                                                                                                                                                                           | 40, 72, 146                                        |
| OH                                                                                | OH                                                                                  |  | Unspecified, <b>75</b>              | <i>D. inoxia</i>                                                                                                                                                                                                                  | 114                                                |

OH

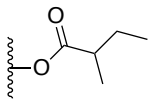

OH

Unspecified, **76**

*D. stramonium*

64

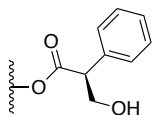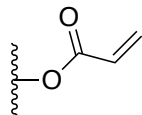

OH

$\alpha$ ,  $\alpha$ -**77**

*D. ferox*

37

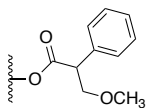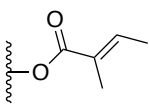

OH

$\beta$ ,  $\beta$ -**7**

*D. stramonium*

48

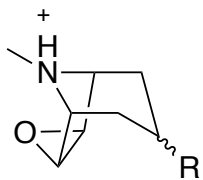

**Table S4: 3-Substituted 6,7-Epoxytropane Alkaloids from *Datura*.**

| $R_1 =$                                                                             | Stereochemistry at Position 3 and number | Species found in                        | References (see main text for reference numbers) |
|-------------------------------------------------------------------------------------|------------------------------------------|-----------------------------------------|--------------------------------------------------|
| OH                                                                                  | $\alpha$ (scopine, <b>78</b> )           | <i>D. inoxia</i> , <i>D. stramonium</i> | 40, 64, 68, 75, 113-114                          |
| OAc                                                                                 | Unspecified, <b>79</b>                   | <i>D. inoxia</i>                        | 113                                              |
| 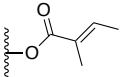 | Unspecified, <b>80</b>                   | <i>D. inoxia</i>                        | 113                                              |



|                                                                                     |                                                      |                                                                                                                                                                                                                                  |                                                                                                   |
|-------------------------------------------------------------------------------------|------------------------------------------------------|----------------------------------------------------------------------------------------------------------------------------------------------------------------------------------------------------------------------------------|---------------------------------------------------------------------------------------------------|
| 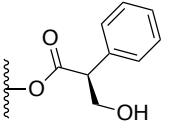   | $\alpha$ (Scopolamine, <b>2</b> )                    | All species, including hairy root cultures                                                                                                                                                                                       | 22, 32, 37, 39, 40, 41, 61, 64, 67, 68, 72, 75, 81, 83, 89, 113-115, 118, 128, 130, 140, 146, 151 |
|    | $\alpha$ (methylscopolamine, <b>81</b> )             | <i>D. metel</i> var. <i>fastuosa</i> , <i>D. stramonium</i> , <i>D. inoxia</i> (including hairy root cultures)                                                                                                                   | 40, 64, 68, 113, 151,                                                                             |
|    | Unspecified or $\alpha$ (aposcopolamine, <b>82</b> ) | <i>D. ceratocaula</i> , <i>D. stramonium</i> (multiple varieties), <i>D. ferox</i> , <i>D. inoxia</i> , <i>D. wrightii</i> , <i>D. leichhardtii</i> ssp. <i>leichhardtii</i> , <i>D. metel</i> (including var. <i>fastuosa</i> ) | 22, 31, 37, 40, 41, 64, 68, 72, 73, 75, 83, 113-114, 118 151                                      |
|    | Unspecified or $\alpha$ , (anisodine, <b>22</b> )    | <i>D. wrightii</i>                                                                                                                                                                                                               | 40                                                                                                |
|   | Unspecified or $\alpha$ , <b>83</b>                  | <i>D. inoxia</i> , <i>D. stramonium</i>                                                                                                                                                                                          | 64, 113                                                                                           |
|  | Unspecified or $\alpha$ ( <b>84</b> )                | <i>D. stramonium</i> (including root cultures), <i>D. inoxia</i> , <i>D. ferox</i>                                                                                                                                               | 37, 40, 64, 68, 72, 75, 113, 118                                                                  |

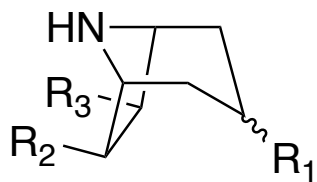

**Table S5: Nortropanes Detected in *Datura*.**

| R <sub>1</sub> =                                                                    | R <sub>2</sub> = | R <sub>3</sub> = | Stereochemistry<br>at Position 3 | Species found in                                                             | References (see main text for reference<br>numbers) |
|-------------------------------------------------------------------------------------|------------------|------------------|----------------------------------|------------------------------------------------------------------------------|-----------------------------------------------------|
| OAc                                                                                 | H                | H                | Not specified, <b>91</b>         | <i>D. wrightii</i> (root cultures), <i>D. quercifolia</i> (root<br>cultures) | 83, 128                                             |
| 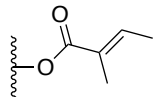 | H                | H                | Not specified, <b>92</b>         | <i>D. stramonium</i> , <i>D. inoxia</i> (including hairy roots)              | 40, 61, 68                                          |

|                                                                                     |                  |                  |                                                   |                                                                                                                                                                                                             |                     |
|-------------------------------------------------------------------------------------|------------------|------------------|---------------------------------------------------|-------------------------------------------------------------------------------------------------------------------------------------------------------------------------------------------------------------|---------------------|
| 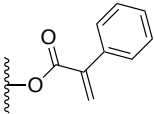   | H                | H                | Not specified, presumably $\alpha$ ,<br><b>93</b> | <i>D. stramonium</i> , <i>D. inoxia</i> , <i>D. ceratocaula</i>                                                                                                                                             | 40, 68, 73, 113-114 |
|    | H                | H                | Not specified, <b>94</b>                          | <i>D. stramonium</i> , <i>D. inoxia</i>                                                                                                                                                                     | 68, 113             |
|    | <b>6,7-epoxy</b> | <b>6,7-epoxy</b> | Not specified, <b>95</b>                          | <i>D. inoxia</i>                                                                                                                                                                                            | 113                 |
|    | <b>6,7-epoxy</b> | <b>6,7-epoxy</b> | Not specified, <b>96</b>                          | <i>D. stramonium</i> , <i>D. ferox</i> , <i>D. inoxia</i> , <i>D. wrightii</i> , <i>D. leichhardtii</i> spp. <i>leichhardtii</i> , <i>D. metel</i> , <i>D. ceratocaula</i>                                  | 40, 68, 72          |
|   | H                | H                | Not specified, <b>97</b>                          | <i>D. inoxia</i> , <i>D. stramonium</i>                                                                                                                                                                     | 113                 |
|  | <b>6,7-epoxy</b> | <b>6,7-epoxy</b> | Not specified, <b>98</b>                          | <i>D. stramonium</i> , <i>D. inoxia</i> , <i>D. ferox</i> , <i>D. wrightii</i> , <i>D. leichhardtii</i> spp. <i>leichhardtii</i> , <i>D. metel</i> (including var. <i>fastuosa</i> ), <i>D. ceratocaula</i> | 40, 64, 68, 72, 113 |

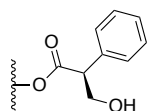

6,7-epoxy

6,7-epoxy

$\alpha$  or unspecified,  
99

*D. stramonium*, *D. discolor*, *D. inoxia*, *D. ferox*, *D. metel* var. *fastuosa*, *D. ceratocaula*

40, 68, 130, 151-152

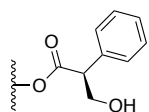

H

H

$\alpha$  or unspecified,  
100

*D. stramonium*, *D. inoxia*, *D. metel* var. *fastuosa*,  
*D. ceratocaula*

68, 73, 113, 146, 152

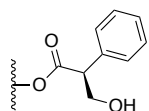

OH

H

$\alpha$  or unspecified,  
101

*D. inoxia*

146

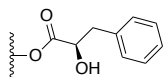

H

H

Unspecified, 102

*D. inoxia*

146

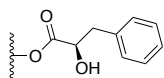

OH

H

Unspecified, 103

*D. inoxia*

146

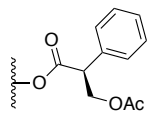

**6,7-epoxy**

**6,7-epoxy**

Unspecified, **104**

*D. stramonium*

68
